# Supplementary material for: Different nitrogen sources speed recovery from corallivory and uniquely alter the microbiome of a reef-building coral
Source: PubMed Central journal article supplement (PMC6859885; doi:10.7717/peerj.8056), 2019-11-15

NMDS2

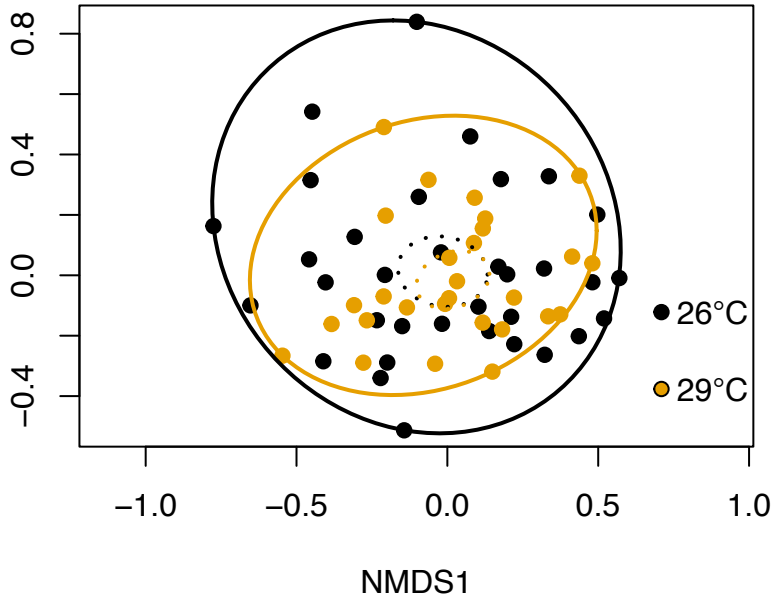

Supplement: peerj-07-8056-s002.pdf [file peerj-07-8056-s002.pdf]
